# Supplementary material for: The role of Leishmania GP63 in the modulation of innate inflammatory response to Leishmania major infection
Source: PubMed Central journal article supplement (PMC8719666; doi:10.1371/journal.pone.0262158), 2021-12-31
Supplement: pone.0262158.s001.pdf [file pone.0262158.s001.pdf]

Figure 1: Anti- GP63

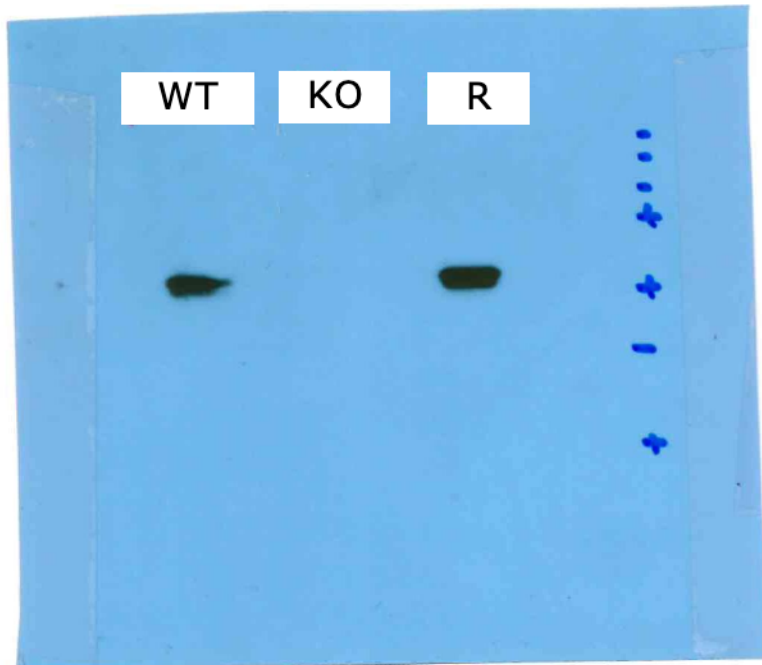

Figure 1: Anti-  $\alpha$  tubulin

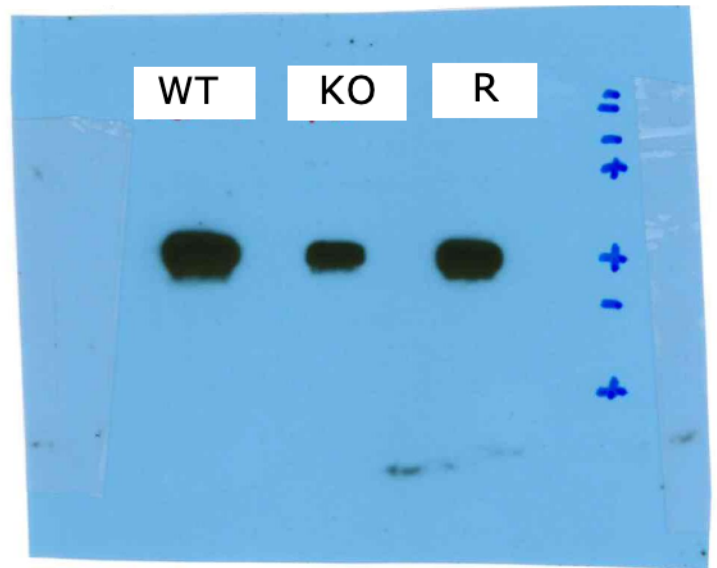

Western blot photos obtained via direct colour scan of x-ray film

Figure 1: Protease activity

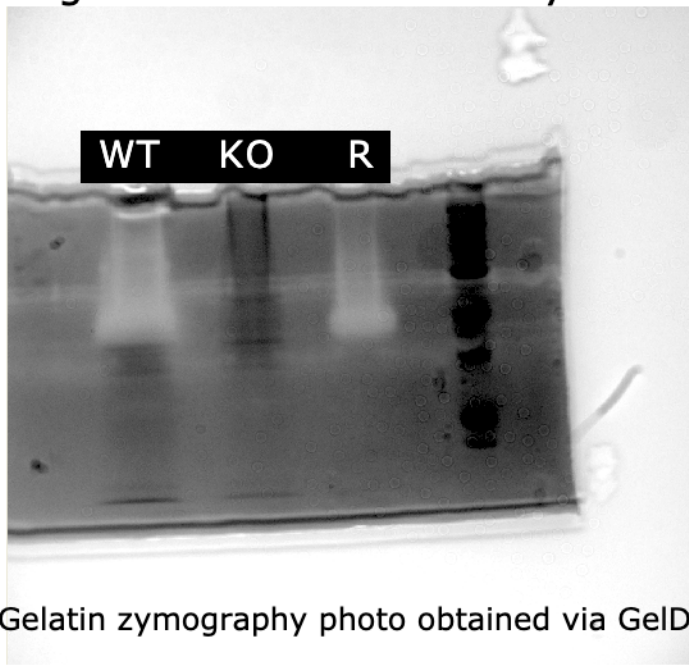

Gelatin zymography photo obtained via GelDoc capture on grayscale setting
